# Supplementary material for: Cities and Climate Change
Source: MDPI journal article supplement (doi:10.3390/earth2040061), 2021-11-27
Supplement: s1 [file s1]

**Table S1.** Recent studies on cities and climate change.

---

**General Climate Change Impacts**

IPCC, 2021 [1]  
 Gobler, 2020 [2]  
 Diaz & Moore, 2017 [3]  
 Ghadge et al., 2020 [4]  
 Tabari, 2020 [5]  
 Watts et al., 2018 [6]  
 Kaczan, & Orgill-Meyer, 2020 [7]  
 Pareek et al., 2020 [8]  
 Hallegatte et al., 2018 [9]  
 Semenza & Ebi, 2019 [10]

---

**Climate Change Mitigation in Cities**

Sari, 2021 [11]  
 Hobbie & Grimm, 2020 [12]  
 Huang-Lachmann et al., 2018 [13]  
 Hughes et al., 2018 [14]  
 Jones, 2017 [15]  
 Kalafatis, 2017 [16]  
 Kalesnikaite, 2019 [17]  
 Koop & van Leeuwen, 2017 [18]  
 Reckien et al., 2018 [19]  
 Bai et al., 2018 [20]  
 Dawson et al., 2017 [21]  
 Tapia et al., 2017 [22]

---

**Climate Change and Extreme Weather Events**

Abiodun et al., 2017 [23]  
 Bastin et al., 2019 [24]  
 Depietri & McPhearson, 2018 [25]  
 Kron et al., 2019 [26]  
 McPhillips et al., 2018 [27]  
 Zhou et al., 2017 [28]  
 Hadipour et al., 2020 [29]  
 Skougaard Kaspersen et al., 2017 [30]  
 Zhou et al., 2019 [31]  
 Zhou et al., 2018 [32]  
 Goss et al., 2020 [33]  
 Westerling, 2018 [34]  
 Short, 2015 [35]  
 Martinuzzi et al., 2015 [36]  
 Theobald & Romme, 2007 [37]  
 Gorte, 2013 [38]  
 Liang, et al., 2020 [39]  
 Short, 2021 [40]  
 Benevolenza & DeRigne, 2019 [41]

---

---

**Climate Change Adaptation in Cities**


---

Broto, 2017 [42]  
 Bulkeley, 2021 [43]  
 Göpfert et al., 2019 [44]  
 Wamsler et al., 2020 [45]  
 Patterson & Huitema, 2019 [46]  
 Short, 2015 [47]  
 Jabareen, 2013 [48]  
 Goh et al., 2020 [49]  
 Göpfert et al., 2019 [50]  
 Frantzeskaki & Rok, 2018 [51]  
 C40, 2021 [52]  
 McLeod, 2020 [53]  
 Bulkeley, 2013 [54]  
 Carter, 2018 [55]  
 Ford et al., 2018 [56]  
 Frantzeskaki et al., 2019 [57]  
 Silva & Costa, 2018 [58]  
 Sharifi, 2021 [59]  
 Ng & Ren, 2018 [60]  
 Grafakos et al., 2020 [61]  
 Pietrapertosa et al., 2019 [62]  
 City of Chicago, [63]  
 Cremades et al., 2021 [64]  
 European Commission, 2021 [65]

---

**Climate Change and Future Impact on Cities**


---

Ortiz et al., 2021 [66]  
 Tellman et al., 2021 [67]  
 Short, 2015 [68]  
 Sovacool & Brown, 2010 [69]  
 Brown et al., 2009 [70]  
 Jones & Kammen, 2011 [71]  
 Vanham & Bidoglio, 2014 [72]  
 Zhao et al., 2011 [73]  
 Hatuka et al., 2018 [74]  
 Arafah et al., 2018 [75]  
 Mundula & Auci, 2019 [76]  
 Bibri & Krogstie, 2017 [77]  
 Geroe, 2019 [78]  
 Chu et al., 2019 [79]  
 Escalante et al., 2020 [80]  
 Frantzeskaki et al., 2018 [81]

---
